# Supplementary material
Source: MDPI journal article supplement (https://www.mdpi.com/2076-3263/13/9/271)
Supplement: s1 [file s1]

*Supporting Information*

# 3D Body-Wave Velocity Structure of the Southern Aegean, Greece

Andreas Karakonstantis <sup>1,\*</sup> and Filippos Vallianatos <sup>1,2</sup>

<sup>1</sup> Institute of Physics of the Earth's Interior and Geohazards, UNESCO Chair on Solid Earth Physics and Geohazards Risk Reduction, Hellenic Mediterranean University Research Center (HMURC), 73133 Chania, Crete, Greece

<sup>2</sup> Section of Geophysics–Geothermy, Department of Geology and Geoenvironment, National and Kapodistrian University of Athens, 15784 Zografou, Athens, Greece; fvallian@geol.uoa.gr

\* Correspondence: akarakon@geol.uoa.gr; Tel.: +302107274285

Contents of this file:

1. Introduction
2. Figure S1
3. Figure S2
4. Figure S3
5. Figure S4

## Introduction

This supporting information provides additional figures that show the horizontal and vertical checkerboard tests across the selected cross-sections. In this file, we present the results of the synthetic modeling. Synthetic travel times were computed for the same source-receiver pairs as used in the final iteration of the real data inversion. At this step, we used the bending algorithm which is briefly described in the methodology section. The execution of this sub-program conducted the tracing of the rays in the synthetic 3D model. The travel times were perturbed by random noise with a magnitude that has a similar variance reduction as the experimental data inversion. When starting the recovery of the model, we "forgot" about the true velocity model and perturbed the locations of sources. Then, we conducted the same inversion procedure as the experimental data analysis, starting from the sources' absolute locations in the starting 1D velocity model (Figure 5 in the manuscript).

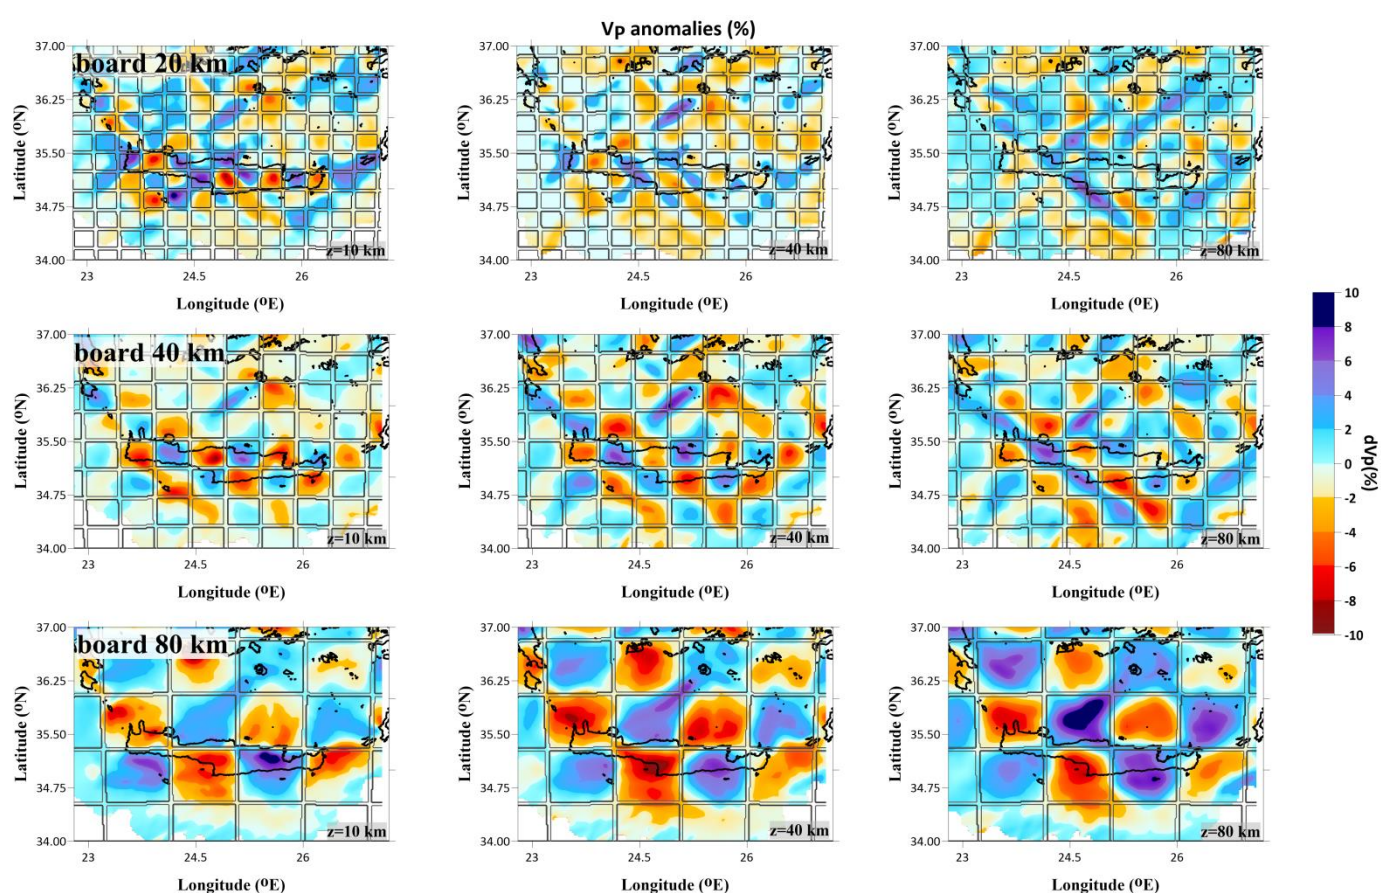

**Figure S1. (11).** Reconstruction of P-wave anomalies for the depth slices of 10, 40, and 80 km and cell size of 20 (upper panel), 40 (second panel), and 80 km (third panel).

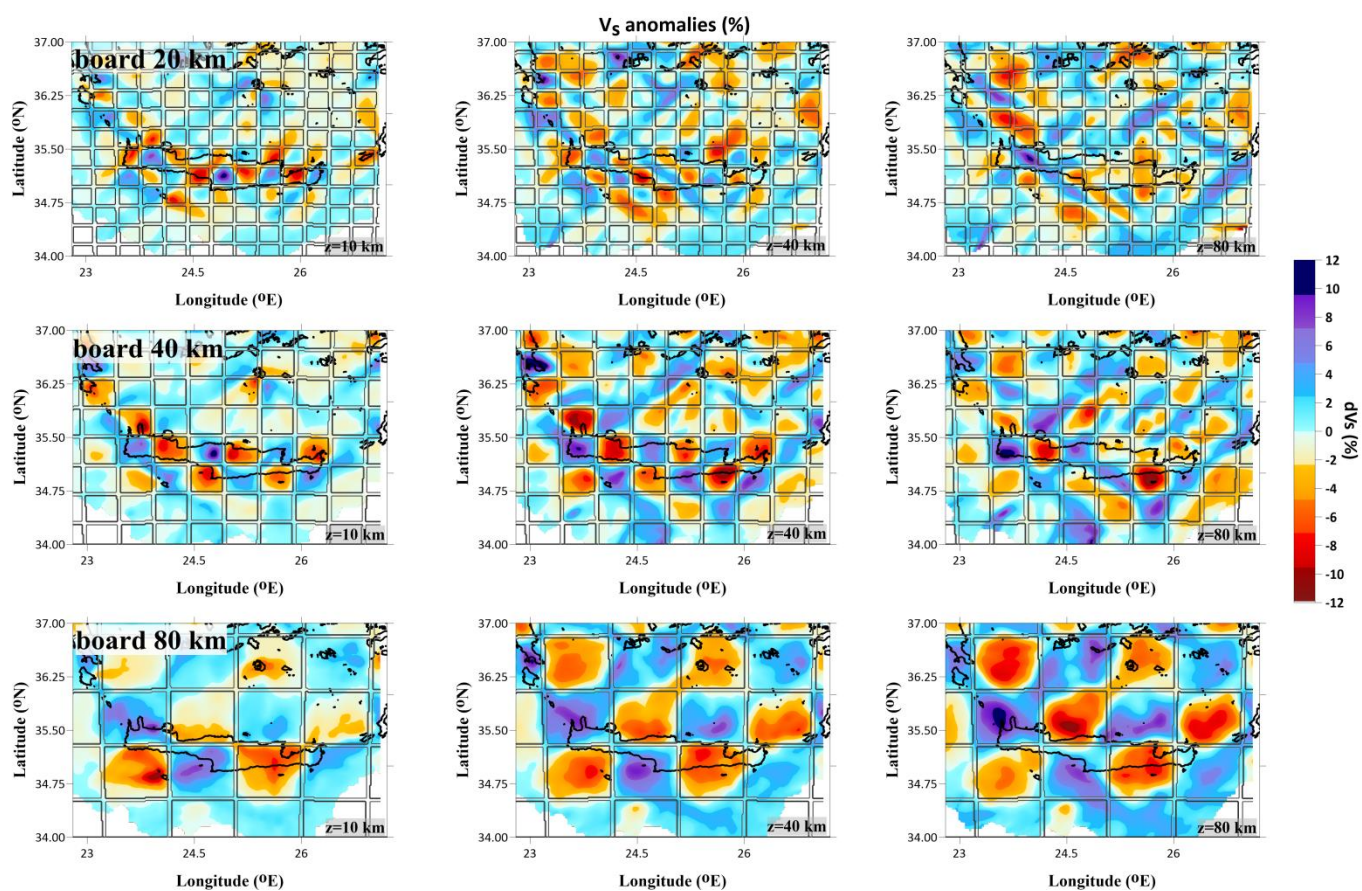

**Figure S2. (12).** Reconstruction of S-wave anomalies for the depth slices of 10, 40, and 80 km and cell size of 20 (upper panel), 40 (second panel), and 80 km (third panel).



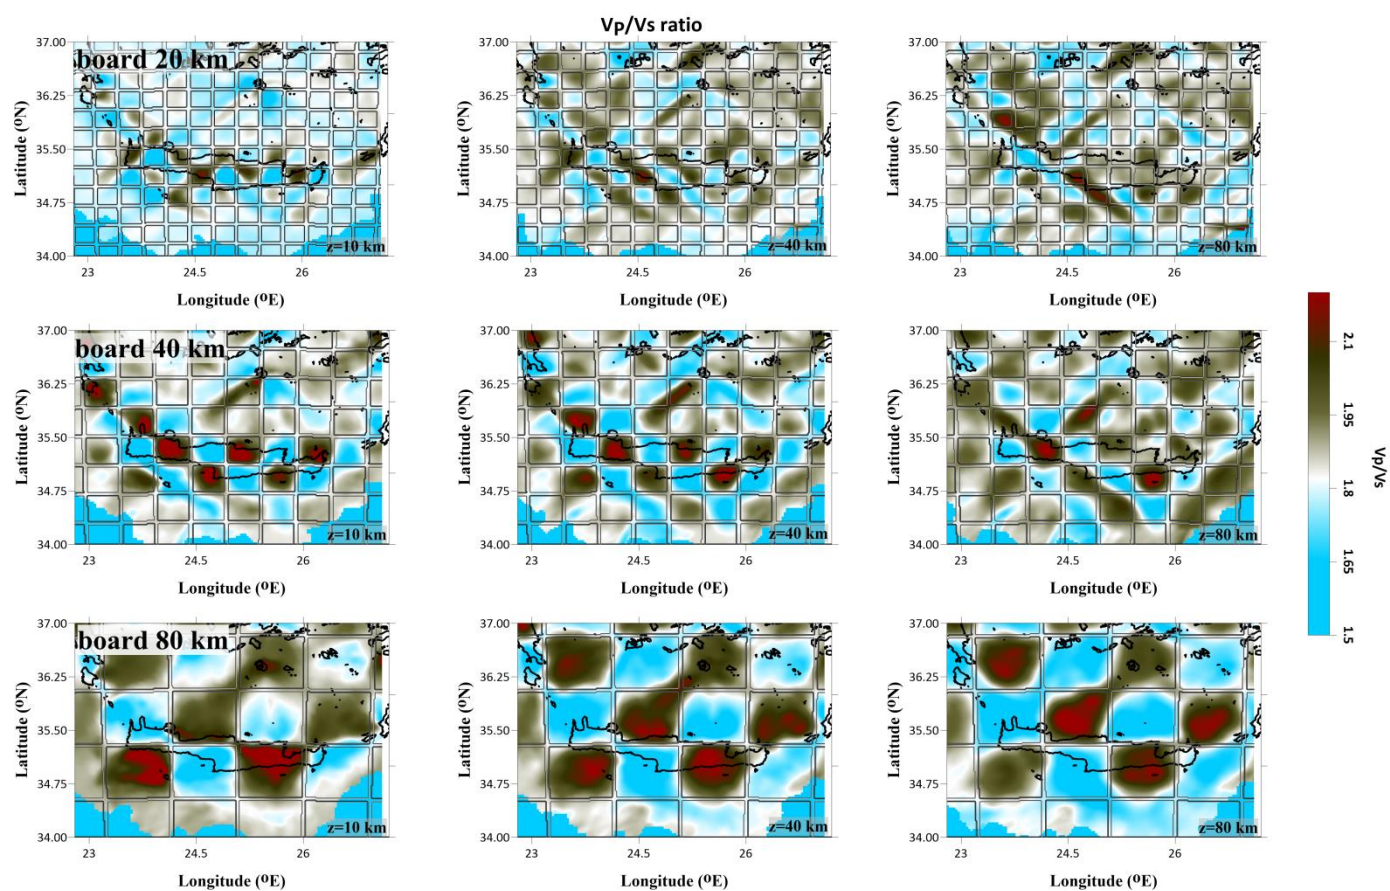

**Figure S3. (13).** Reconstruction of V<sub>p</sub>/V<sub>s</sub> ratio for the depth slices of 10, 40, and 80 km and cell size of 20 (upper panel), 40 (second panel), and 80 km (third panel).

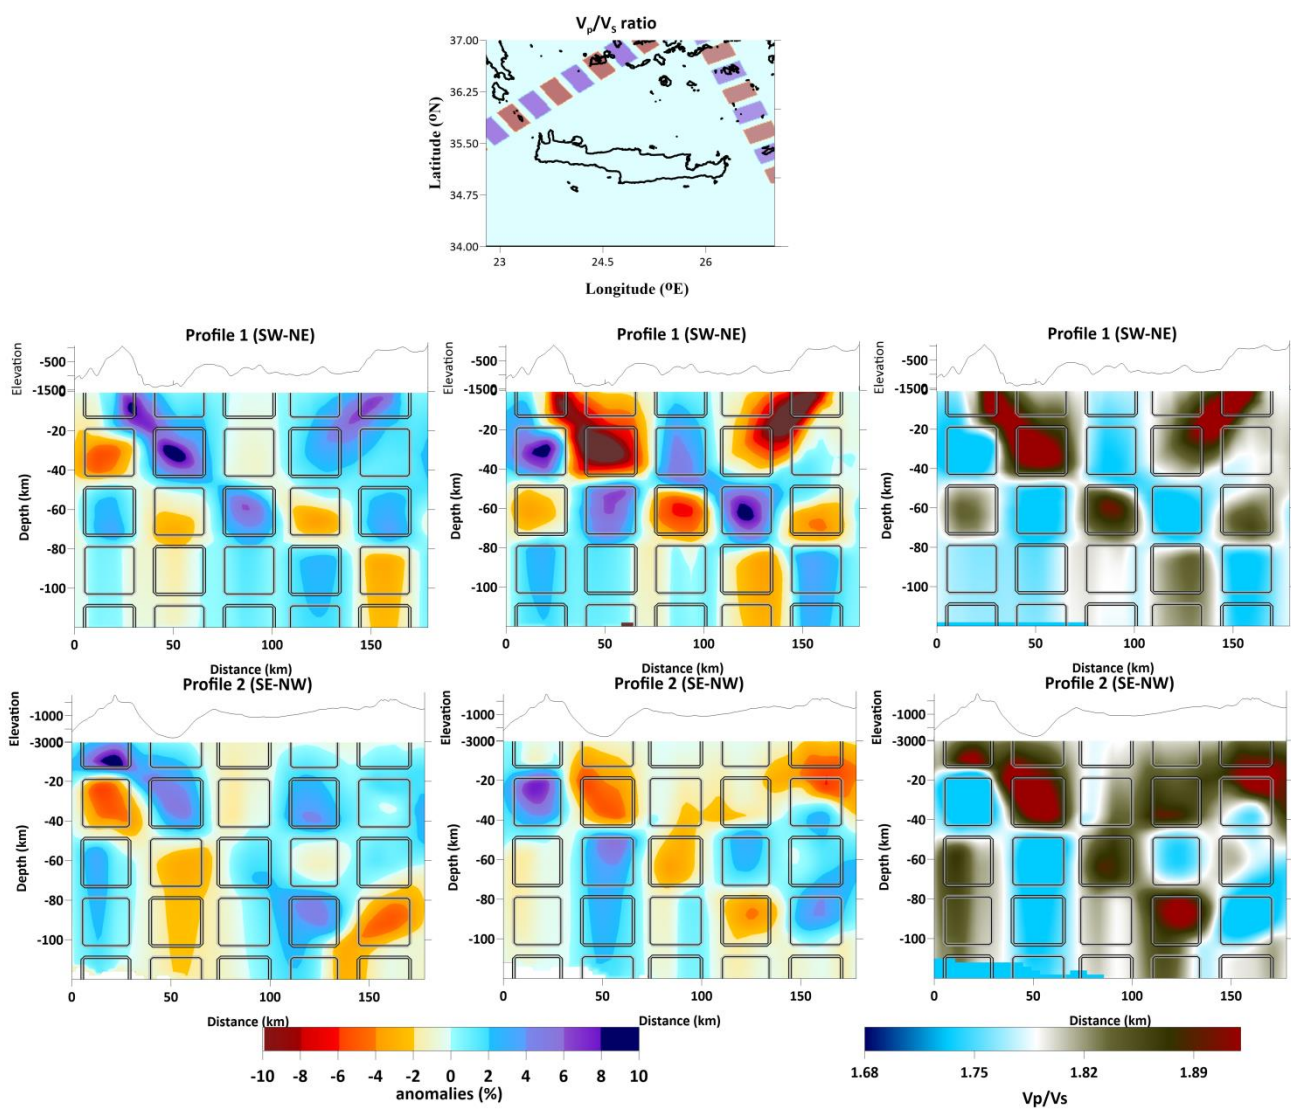

**Figure S4.** Checkerboard tests for checking the vertical resolution. The locations of the initial synthetic anomalies are indicated with rectangles of 20x20 km<sup>2</sup>.
